# Supplementary material for: Extravesicular TIMP-1 is a non-invasive independent prognostic marker and potential therapeutic target in colorectal liver metastases
Source: PubMed Central journal article supplement (PMC8933275; doi:10.1038/s41388-022-02218-9), 2022-02-09
Supplement: 41388_2022_2218_MOESM2_ESM.pdf [file 41388_2022_2218_MOESM2_ESM.pdf]

**Supplementary Table S1**

Table S1. Gender-based characteristics of the fibroblast cell lines and EVs used for the study

| Characteristics |        | Fibroblasts |    |          | EVs              |           |           |                |                   |
|-----------------|--------|-------------|----|----------|------------------|-----------|-----------|----------------|-------------------|
|                 |        | Overall     | BJ | PF       | Treatment assays |           |           |                | Biomarker studies |
|                 |        |             |    |          | Overall          | CRC       | CRC liver | MET Cell lines | CRC liver MET     |
| Gender (%)      | Female | 2 (50)      |    | 2 (66.7) | 134 (34)         | 15 (11.2) | 26 (19.4) | 1 (0.7)        | 92 (68.7)         |
|                 | Male   | 2 (50)      | 1  | 1 (33.3) | 261 (66)         | 29 (11.1) | 66 (25.3) | 2 (0.8)        | 164 (62.8)        |

**Supplementary Table S2**

Table S2. Clinical characteristics of the IHC study cohort

|                              |           | Overall     | CRC liver MET | CRC        |
|------------------------------|-----------|-------------|---------------|------------|
| n                            |           | 161         | 80            | 81         |
| Median follow-up time (days) |           | 2945        | 1581          | 1364       |
| Age (median)                 |           | 141         | 68.5          | 72.5       |
| Gender (%)                   | Female    | 76 (47.2)   | 52 (65)       | 24 (29.62) |
|                              | Male      | 85 (52.8)   | 28 (35)       | 57 (70.37) |
| Residual disease (%)         | No        | 152 (94.41) | 75 (93.75)    | 77 (95.1)  |
|                              | Yes       | 9 (11.11)   | 5 (6.25)      | 4 (4.94)   |
| Neoadjuvant therapy (%)      | No        | 110 (68.32) | 50 (62.5)     | 60 (74.07) |
|                              | Yes       | 51 (31.68)  | 30 (37.5)     | 21 (25.92) |
| Tumor differentiation (%)    | G1-G3     | 101 (62.73) | 49 (61.25)    | 52 (64.2)  |
|                              | G4        | 2 (1.24)    | 1 (1.25)      | 1 (1.23)   |
| TNM (%)                      | I-II      | 48 (29.81)  | 6 (7.5)       | 42 (51.9)  |
|                              | III-IV    | 104 (64.6)  | 71 (88.75)    | 33 (40.74) |
| KRAS (%)                     | Mutant    | 28 (17.39)  | 18 (22.5)     | 10 (12.35) |
|                              | Wild type | 9 (5.59)    | 8 (10)        | 1 (1.23)   |

**Supplementary Table S3**

Table S3. Clinical characteristics of the ELISA study cohort

|                              | Overall    | Discovery Cohort | Validation Cohort I | Validation cohort II (external) |
|------------------------------|------------|------------------|---------------------|---------------------------------|
| n                            | 256        | 151              | 49                  | 56                              |
| Median follow-up time (days) | 1728       | 753              | 310                 | 665                             |
| Age (median)                 | 66         | 65               | 69                  | 68                              |
| Gender (%)                   |            |                  |                     |                                 |
| Female                       | 92 (35.9)  | 47 (51.1)        | 22 (23.9)           | 23 (25.0)                       |
| Male                         | 164 (64.1) | 104 (63.4)       | 27 (16.5)           | 33 (20.1)                       |
| Neoadjuvant therapy (%)      |            |                  |                     |                                 |
| No                           | 68 (30)    | 46 (67.6)        | 10 (14.7)           | 12 (17.6)                       |
| Yes                          | 159 (70)   | 105(66)          | 39 (24.5)           | 15 (9.4)                        |
| TNM (%)                      |            |                  |                     |                                 |
| IVA                          | 182 (78.8) | 100 (54.9)       | 32 (17.6)           | 50 (24.5)                       |
| IVB                          | 49 (21.2)  | 39 (79.6)        | 4 (8.2)             | 6 (12.2)                        |
| KRAS (%)                     |            |                  |                     |                                 |
| Mutant                       | 66 (46.5)  | 51 (77.3)        | 15 (22.7)           | 0 (0.0)                         |
| Wildtype                     | 76 (53.5)  | 63 (82.9)        | 13 (17.1)           | 0 (0.0)                         |

Supplementary Table S4

**Primer list**

| Gene   | Primer sequence                                  | Final concentration (pmol/ul) | Application |
|--------|--------------------------------------------------|-------------------------------|-------------|
| ACTA2  | CATCGAAATGAACGTTTCC<br>CCCTGATAGGACATGTTAGG      | 1                             | RT-qPCR     |
| COL1A1 | GTGCTAAAGGTGCCAATGGT<br>ACCAGGTACCCGCTGTTAC      | 1                             | RT-qPCR     |
| FN1    | CAAGCATGTCCTCTGCCAAG<br>CAGAACAGGCAATGTCAGC      | 1                             | RT-qPCR     |
| TIMP1  | TGTTGCTGGGCTGATAG<br>CTGGTATAAGGTGGTCTGG         | 1                             | RT-qPCR     |
| TIMP2  | ACGATATACAGGCACATTATG<br>GGTCAGGAGCTTAACAGG      | 3                             | RT-qPCR     |
| TIMP3  | GGTGAAGCCTCGGTACATCT<br>AGGACGCCTCTGCAACTC       | 1                             | RT-qPCR     |
| TIMP4  | TTTCTTCTGGCTTAGTCTGTTTCT<br>ATTCGCCATTCTCCCTACCA | 1                             | RT-qPCR     |
| TAGLN  | AAGAATGATGGGCACTACCG<br>ATGACATGCTTCCCTCCTG      | 1                             | RT-qPCR     |
| VTN    | GAGTCAAGCCCAAGTGAC<br>GCCATCGTCATAGACCCTGT       | 1                             | RT-qPCR     |
| TNC    | TAACGGTGGTGGATTCTGGG<br>CTCCGGTCCGGCTCTGTA       | 1                             | RT-qPCR     |
| ACTB   | CATGACGTTGCTATCCAGGC<br>CTCCTTAATGTCACGCACGAT    | 1                             | RT-qPCR     |
| NRP1   | CCCAACAGCCTGAAATGCAC<br>ATTCTAGCCGGTCTGAGCG      | 1                             | RT-qPCR     |
| NRP2   | CTGTGGTTCATCCGTGAGGAC<br>ATGGGTCCATGCAGTCTCCAG   | 1                             | RT-qPCR     |

| Application    | Primer name   | Primer sequence     |
|----------------|---------------|---------------------|
| TIMP1 knockout | TIMP1 gRNA KO | CAGGTCCACAACCGCAGCG |

**Antibody List**

| Application          | Antibody/ Protein recognized | Vendor                   | Product reference | Antibody dilution |
|----------------------|------------------------------|--------------------------|-------------------|-------------------|
| Immunoblot           | TIMP-1 (D10E6)               | Cell Signaling           | D10E6             | 1:1000            |
|                      | TSG101 (4A10)                | abcam                    | ab83              | 1:500             |
|                      | CD81                         | Santa Cruz biotechnology | sc-166029         | 1:1000            |
|                      | Integrin-β1                  | Cell Signaling           | 9699              | 1:1000            |
|                      | anti-TSG101                  | abcam                    | ab83              | 1:500             |
|                      | HSP90AA                      | Enzo Life Tech.          | ADI-SPS-771-D     | 1:1000            |
|                      | Anti-CD63 antibody           | abcam                    | 68418             | 1:500             |
|                      | Syntenin1(EPR8102)           | abcam                    | ab133267          | 1:1000            |
|                      | Anti-ALIX antibody [3A9]     | abcam                    | ab117600          | 1:1000            |
|                      | Calreticulin                 | Cell Signaling           | 2891S             | 1:1000            |
|                      | anti-mouse IgG HRP-linked    | Cell Signaling           | 7076              | 1:5000            |
|                      | anti-rabbit IgG HRP linked   | Cell Signaling           | 7074              | 1:3000            |
|                      | Immunoprecipitation          | HSP90AA                  | LS Bio            | LS-B7446-50       |
| Anti-CD63 antibody   |                              | Novus biologicals        | LAMP3/2788        | 1:1000            |
| Immunohistochemistry | TIMP-1 (D10E6)               | Cell Signaling           | D10E6             | 1:200             |

**Inhibitors**

| Product name                                                           | Vendor              | Product reference | Dilution |
|------------------------------------------------------------------------|---------------------|-------------------|----------|
| Heparin ammonium salt from porcine intestinal mucosa ≥180 USP units/mg | Merck-Sigma Aldrich | H7484             | 100µg/ml |
| 17AAG-CAS 75747-14-7 - Calbiochem                                      | Sigma- Aldrich      | 75747-14-7        | 0.5µM    |
